# Supplementary material for: Unveiling senescence-associated ocular pathogenesis via lacrimal gland organoid magnetic bioassembly platform and HMGB1-Box A gene therapy
Source: PubMed Central journal article supplement — Sci Rep. 2024 Sep 18;14:21784. doi: 10.1038/s41598-024-73101-8 (PMC11410968; doi:10.1038/s41598-024-73101-8), 2024-09-18
Supplement: 41598_2024_73101_MOESM1_ESM.pdf [file 41598_2024_73101_MOESM1_ESM.pdf]

# Supplementary Information File

Ferreira JN, et al. 2024

**Table S1.** List of primary and secondary antibodies and respective dilutions. AF - Alexa Fluor™, HRP - horseradish peroxidase-conjugated

| <b>Antibody</b>                  | <b>Source</b>     | <b>Catalog No.</b> | <b>Dilution</b> |
|----------------------------------|-------------------|--------------------|-----------------|
| Rabbit monoclonal anti-AQP-5 IgG | Abcam             | Ab92320            | 1:100           |
| Rabbit polyclonal anti-KRT5 IgG  | Abcam             | Ab53121            | 1:100           |
| Rabbit monoclonal anti-KRT14 IgG | Abcam             | Ab181595           | 1:100           |
| Mouse monoclonal anti-KRT19 IgG  | Novus biologicals | NBP142238          | 1:100           |
| Rabbit polyclonal anti-NKCC1 IgG | Abcam             | Ab59791            | 1:100           |
| Mouse monoclonal anti-GAPDH IgG  | Santa Cruz        | sc-365062          | 1:100           |
| AF 594 goat anti-rabbit IgG      | Abcam             | Ab150080           | 1:200           |
| AF 488 goat anti-rabbit IgG      | Abcam             | Ab150077           | 1:200           |
| AF 488 goat anti-mouse IgG       | Abcam             | Ab150113           | 1:200           |
| Goat anti-rabbit IgG, (H+L) HRP  | Invitrogen        | 1TFS-AB-626120     | 1:3000          |
| Goat anti-mouse IgG, (H+L) HRP   | Invitrogen        | 1TFS-AB-626520     | 1:2000          |

**Table S2.** List of media, solutions and reagents used for LG primary cell isolation and organoid culture. Please see reference 14 for more details.

| Washing buffer                      | Final concentration | Volume (mL) |
|-------------------------------------|---------------------|-------------|
| 1XPBS                               | Not applicable      | 86.67       |
| 1XPBSPenicillin/Streptomycin (100%) | 10%v/v              | 10          |
| Bovine resum albumin (30%)          | 1%v/v               | 3.33        |
| Total                               |                     | 100         |

| Enzymatic dissociation buffer       | Final concentration | Volume (mL) |
|-------------------------------------|---------------------|-------------|
| 1XPBS                               | Not applicable      | 1.763       |
| 1XPBSPenicillin/Streptomycin (100%) | 1%v/v               | 0.020       |
| Bovine resum albumin (30%)          | 1%v/v               | 0.067       |
| Calcium chloride solution (50 mM)   | 1.25 mM             | 0.050       |
| Collagenase II (40 mg/mL)           | 1 mg/mL             | 0.050       |
| Hyaluronidase                       | 1 mg/mL             | 0.050       |
| Total                               |                     | 2           |

| Basal media                    | Final concentration | Volume (mL) |
|--------------------------------|---------------------|-------------|
| DMEM/F12                       | Not applicable      | 98          |
| L-Glutamine (100 mM)           | 1 mM                | 1           |
| Penicillin/Streptomycin (100%) | 1% v/v              | 1           |
| Total                          |                     | 100         |

| Expansion media (EM)      | Final concentration | Volume (mL) |
|---------------------------|---------------------|-------------|
| Basal media               | Not applicable      | 94.85       |
| Fetal bovine serum (100%) | 5%v/v               | 5           |
| EGF (20 µg/mL)            | 20 ng/mL            | 0.1         |
| Total                     |                     | 100         |

| Epithelial enrichment media (EEM) | Final concentration | Volume (mL) |
|-----------------------------------|---------------------|-------------|
| Define Keratinocyte SFM           | Not applicable      | 99.80       |
| EGF (20 µg/mL)                    | 20 ng/mL            | 0.1         |
| FGF-10 (100 µg/mL)                | 50 ng/mL            | 0.05        |
| FGF-7 (100 µg/mL)                 | 50 ng/mL            | 0.05        |
| Total                             |                     | 100         |

**Table S3.** Statistical analysis output from Z-score heatmap displayed in Fig. 2E comparing native LG tissue biopsies (NLG) with the LG organoid (LGO) experimental group (n=3/group). \*  $p$ -value < 0.05

| <b>Gene</b>    | <b>Adjusted <math>p</math>-value</b> | <b>Gene</b>     | <b>Adjusted <math>p</math>-value</b> |
|----------------|--------------------------------------|-----------------|--------------------------------------|
| <i>BMP4</i>    | 0.2381                               | <i>NFYA*</i>    | 0.0351                               |
| <i>BMPR1A</i>  | 0.1462                               | <i>NLK</i>      | 0.5193                               |
| <i>BMPR2</i>   | 0.8510                               | <i>NRAS</i>     | 0.6973                               |
| <i>CD44</i>    | 0.9681                               | <i>PAFAH1B1</i> | 0.8893                               |
| <i>CDH1</i>    | 0.4199                               | <i>PCGF6*</i>   | 0.0209                               |
| <i>CTBP1</i>   | 0.8850                               | <i>POU5F1</i>   | 0.4099                               |
| <i>CTNND1*</i> | 0.0097                               | <i>PPARD</i>    | 0.4860                               |
| <i>DLX5*</i>   | 0.0026                               | <i>PPP2CA</i>   | 0.1836                               |
| <i>DVL3</i>    | 0.8616                               | <i>PPP2R1A</i>  | 0.9474                               |
| <i>EPAS1*</i>  | 0.0008                               | <i>PPP2R1B</i>  | 0.3794                               |
| <i>FGF2*</i>   | 0.0009                               | <i>PPP2R2A</i>  | 0.1023                               |
| <i>FOXD3</i>   | 0.6509                               | <i>PPP2R5B</i>  | 0.9569                               |
| <i>FZD1</i>    | 0.2743                               | <i>PPP2R5C</i>  | 0.3583                               |
| <i>FZD4</i>    | 0.2950                               | <i>PPP2R5E</i>  | 0.2591                               |
| <i>FZD7*</i>   | 0.0125                               | <i>PRKCH</i>    | 0.0532                               |
| <i>ID2*</i>    | 0.0037                               | <i>PRKCI</i>    | 0.4339                               |
| <i>ID4*</i>    | 0.0059                               | <i>RAF1</i>     | 0.1154                               |
| <i>IL6ST</i>   | 0.1073                               | <i>RHOA</i>     | 0.5371                               |
| <i>JARID2</i>  | 0.0959                               | <i>SMAD9</i>    | 0.0780                               |
| <i>KLF4</i>    | 0.4105                               | <i>SMARCD1</i>  | 0.8749                               |
| <i>LEF1</i>    | 0.5548                               | <i>SOX2*</i>    | 0.0331                               |
| <i>LIF</i>     | 0.5794                               | <i>STAT3</i>    | 0.2041                               |
| <i>MAP2K4</i>  | 0.1699                               | <i>UTF1</i>     | 0.1274                               |
| <i>MAP3K7</i>  | 0.9328                               | <i>VIM</i>      | 0.3848                               |
| <i>MAPK11</i>  | 0.7663                               | <i>WNT10B</i>   | 0.4816                               |
| <i>MAPK14*</i> | 0.0499                               | <i>WNT3*</i>    | 0.0405                               |
| <i>MEIS1</i>   | 0.0537                               | <i>WNT3A</i>    | 0.3986                               |
| <i>MYC*</i>    | 0.0019                               | <i>ZFHX3</i>    | 0.1915                               |

**Table S4.** Statistical analysis output from plotted Z-scores displayed in Fig. 3E comparing the LG organoid (LGO) with the senescence-induced LGO treated with etoposide (LGO+Eto) experimental groups (n=3/group). \**p*-value < 0.05

| <b>Gene</b>     | <b>Adjusted <i>p</i>-value</b> |
|-----------------|--------------------------------|
| <i>CASP3</i> *  | 0.0276                         |
| <i>CASP9</i>    | 0.4140                         |
| <i>SFN</i> *    | 0.0004                         |
| <i>TP53</i> *   | 0.0071                         |
| <i>CDC20</i> *  | 0.0350                         |
| <i>UBE2C</i> *  | 0.0273                         |
| <i>UBE2D1</i> * | 0.0003                         |
| <i>CCNA2</i> *  | 0.0006                         |
| <i>CCNB1</i> *  | 0.0085                         |

**Table S5.** Statistical analysis output from plotted Z-scores displayed in Fig. 4G comparing the senescence-induced etoposide-treated LG organoid (LGO+Eto) with the etoposide-treated LG organoid transfected with Box A plasmid (LGO+Eto+BoxA) experimental groups (n=3/group). \**p*-value < 0.05

| <b>Gene</b>     | <b>Adjusted <i>p</i>-value</b> |
|-----------------|--------------------------------|
| <i>HMGB1</i> *  | 0.00130                        |
| <i>CASP3</i> *  | 0.04650                        |
| <i>CASP9</i>    | 0.96983                        |
| <i>SFN</i> *    | 0.00038                        |
| <i>TP53</i> *   | 0.01698                        |
| <i>TUBA1C</i> * | 0.04881                        |
| <i>VIM</i> *    | 0.00171                        |
| <i>CDC20</i> *  | 0.01467                        |
| <i>UBE2C</i> *  | 0.01330                        |
| <i>UBE2D1</i> * | 0.00693                        |
| <i>CCNA2</i> *  | 0.00005                        |
| <i>CCNB1</i> *  | 0.00156                        |

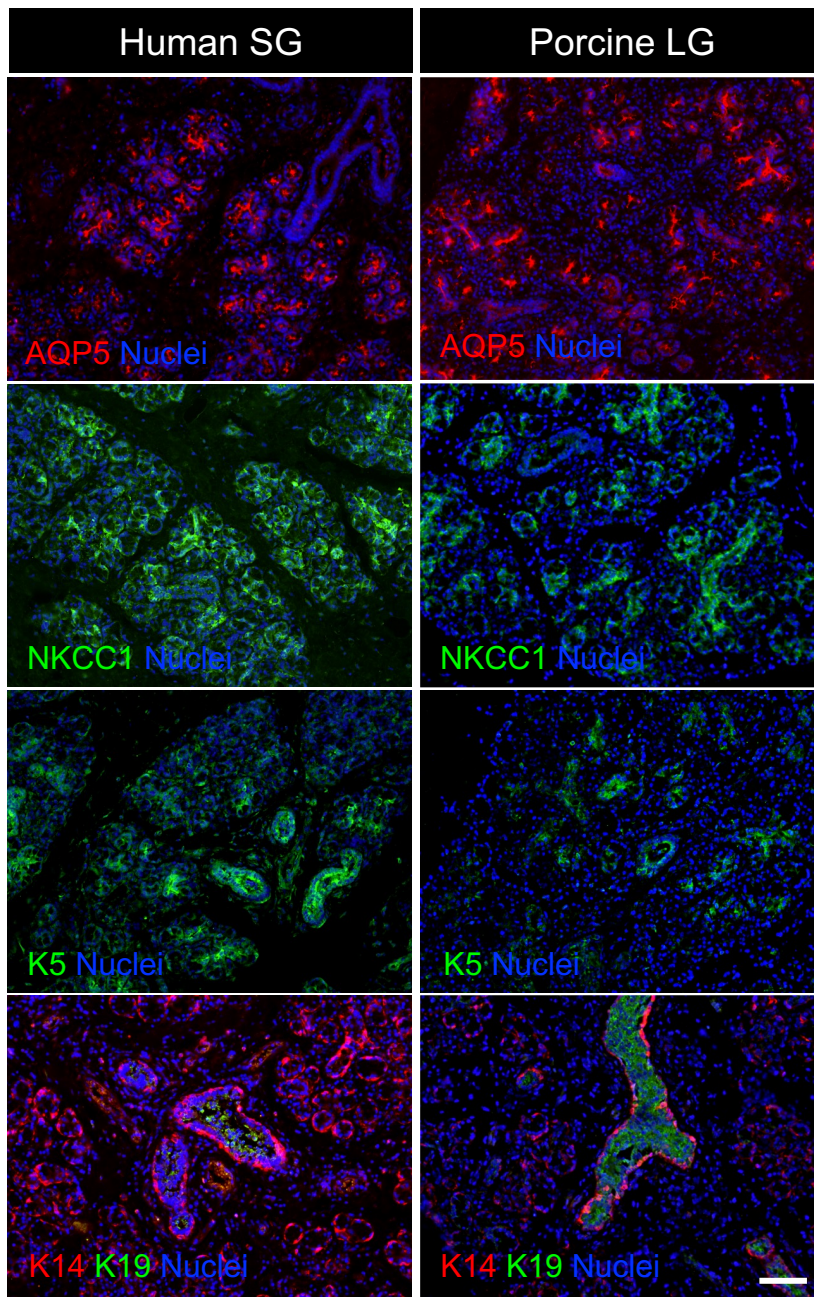

**Figure S1.** Primary antibody validation and characterization for LG-like protein markers. SG – salivary gland. LG – lacrimal gland. Scale bar: 200  $\mu$ m.

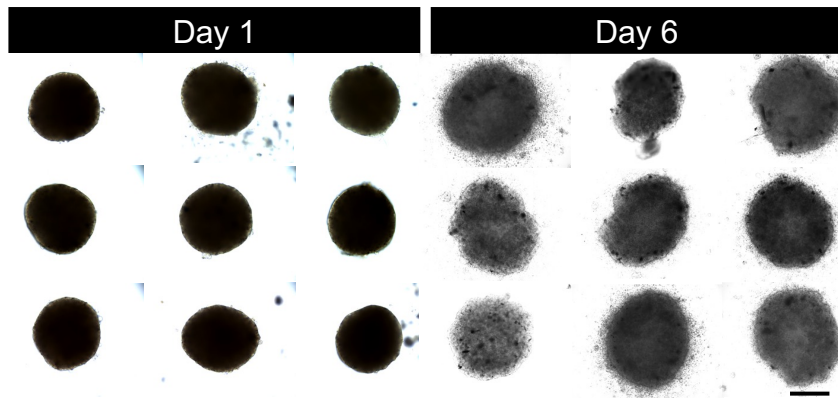

**Figure S2.** Brightfield micrographs showing consistent biofabrication of LG spheroids by M3DB at 1 and 6 days of culture. Scale bar: 200  $\mu\text{m}$ .



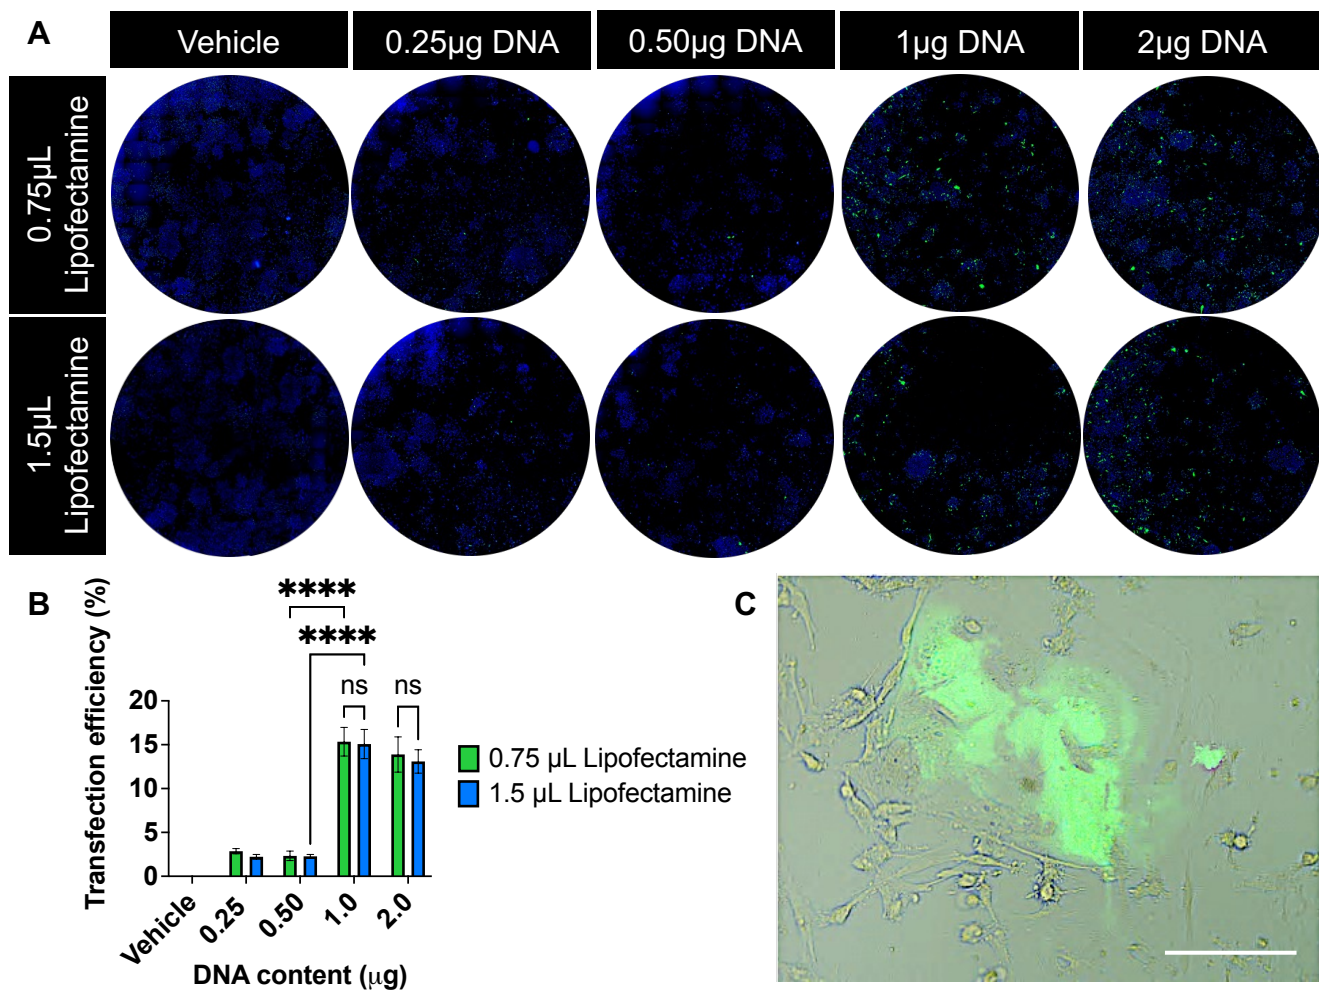

**Figure S3.** Plasmid transfection efficiency of Box A-GFP plasmid in differentiated LG cells. Epithelial enriched porcine LG cells cultured as a monolayer and were transfected with Box A plasmid at various of DNA content:Lipofectamine ratios. **A** The transfection efficiency was determined by observing GFP signal under a fluorescence microscope. **B** Transfected cells were quantified by automated cytometry using Countess 3 Automated Cell Counter and results were plotted as mean  $\pm$ S.D. \*\*\*\* $p$ <0.0001 when compared with non-transfected cells or untreated control by a two-way ANOVA ( $n=3$ ). LG cells treated with only Lipofectamine was recognized as a vehicle control. **C** Representative fluorescence micrograph displaying the Box A-GFP-expressed in epithelial-like LG cells. Scale bar: 100  $\mu$ m.

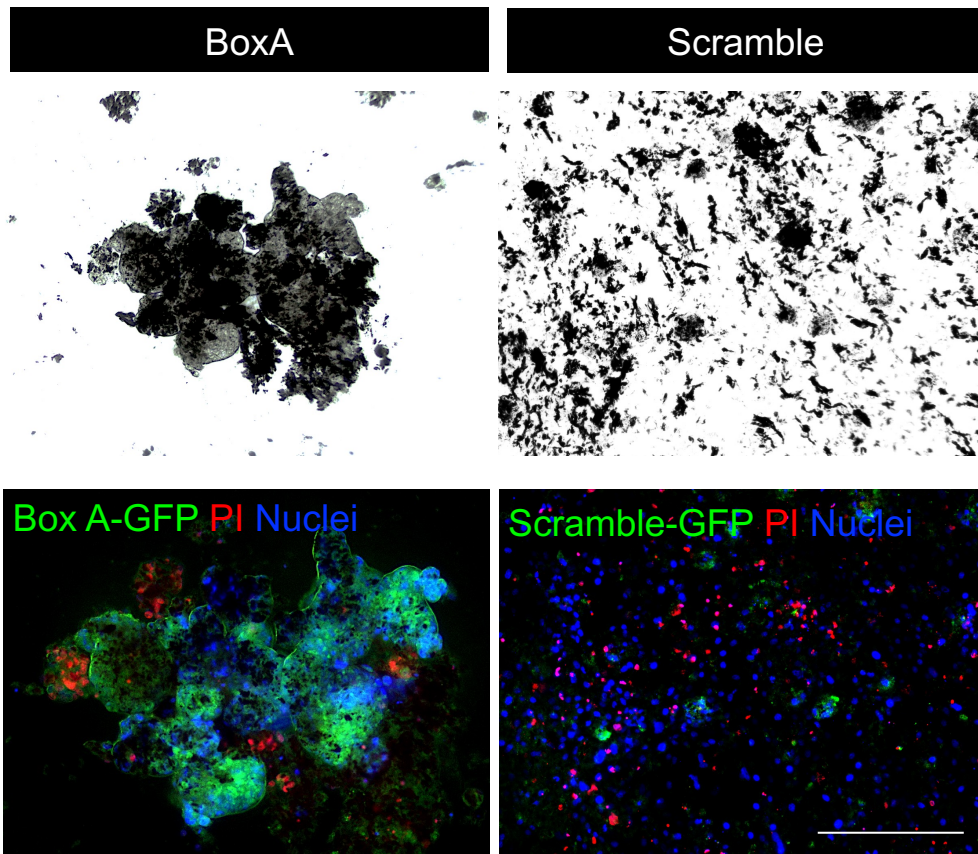

**Figure S4.** Cell viability assessment by propidium iodide (PI) staining after LG cell transfection in monolayer cultures with Box A-GFP and Scramble-GFP plasmids. Scale bar: 200  $\mu\text{m}$ .

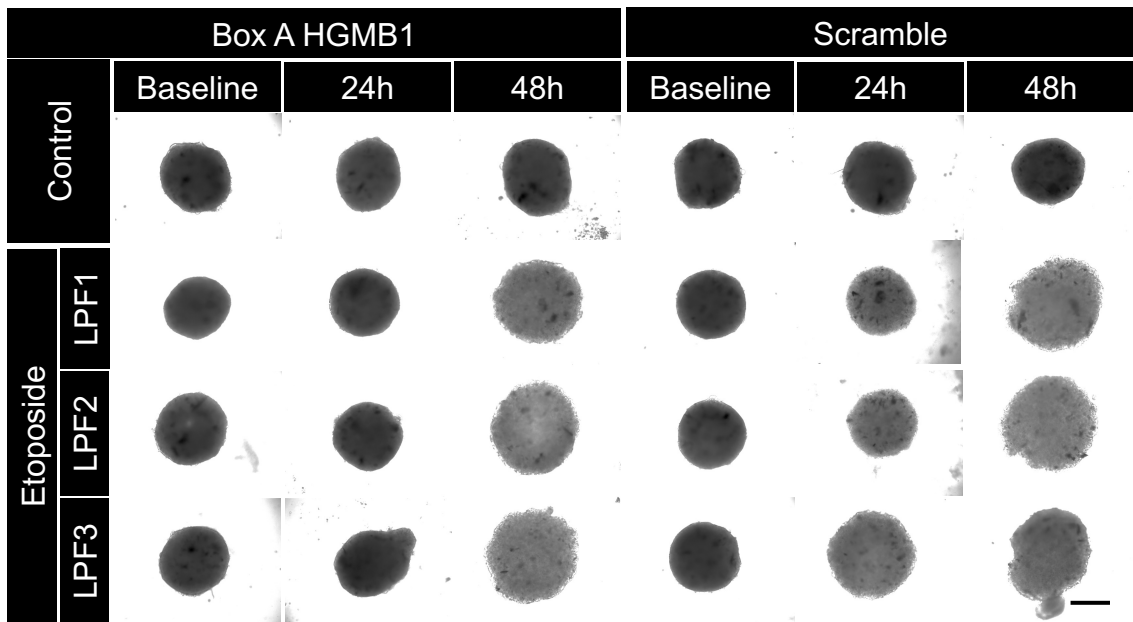

**Figure S5.** Brightfield micrographs showing the morphology of organoids assembled by magnetic bioprinting of primary LG cells up to 48h of culture after gene therapy (Box A HMGB1 or Scramble) and senescence induction by 10  $\mu$ M of etoposide. Scale bar: 200  $\mu$ m.

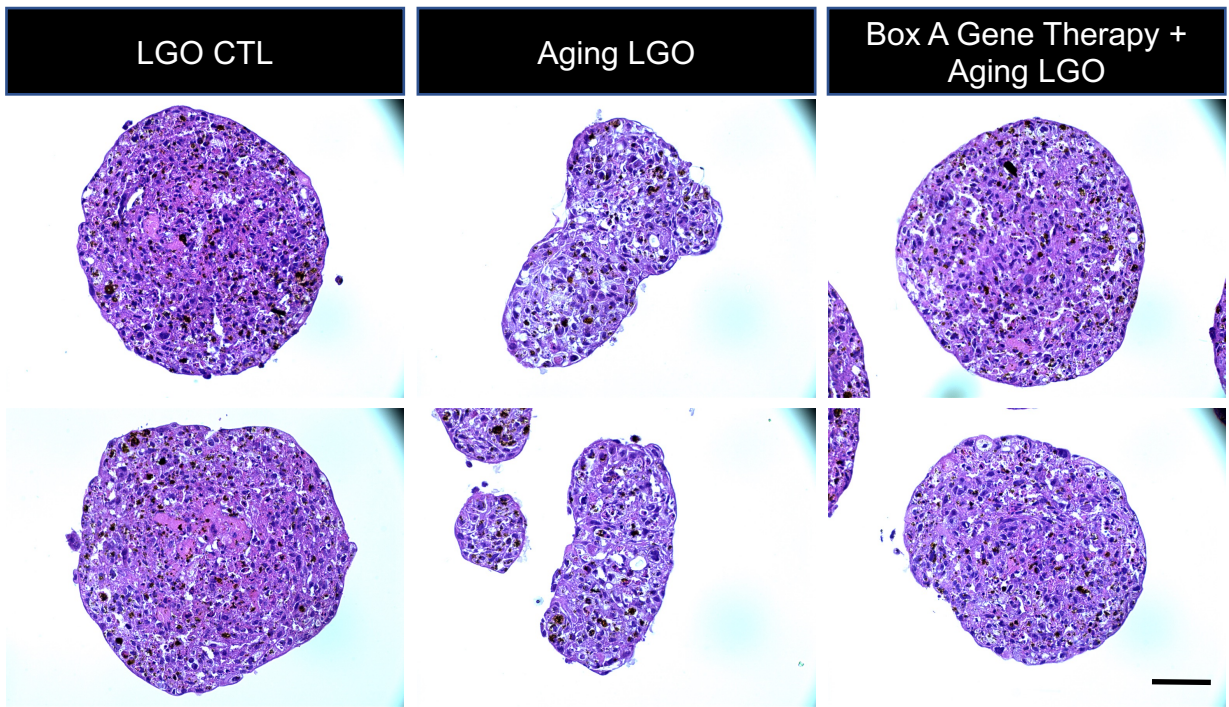

**Figure S6.** Brightfield micrographs after H&E staining for histological comparison and showing the morphology of the epithelial parenchyma with epithelial cells and matrix deposition in healthy LG organoids (LGO) and in LGO after aging induction without and with Box A gene therapy. The senescence-associated pathogenesis phenotype can be observed in the aging LGO without gene therapy. Scale bar: 50  $\mu\text{m}$ .

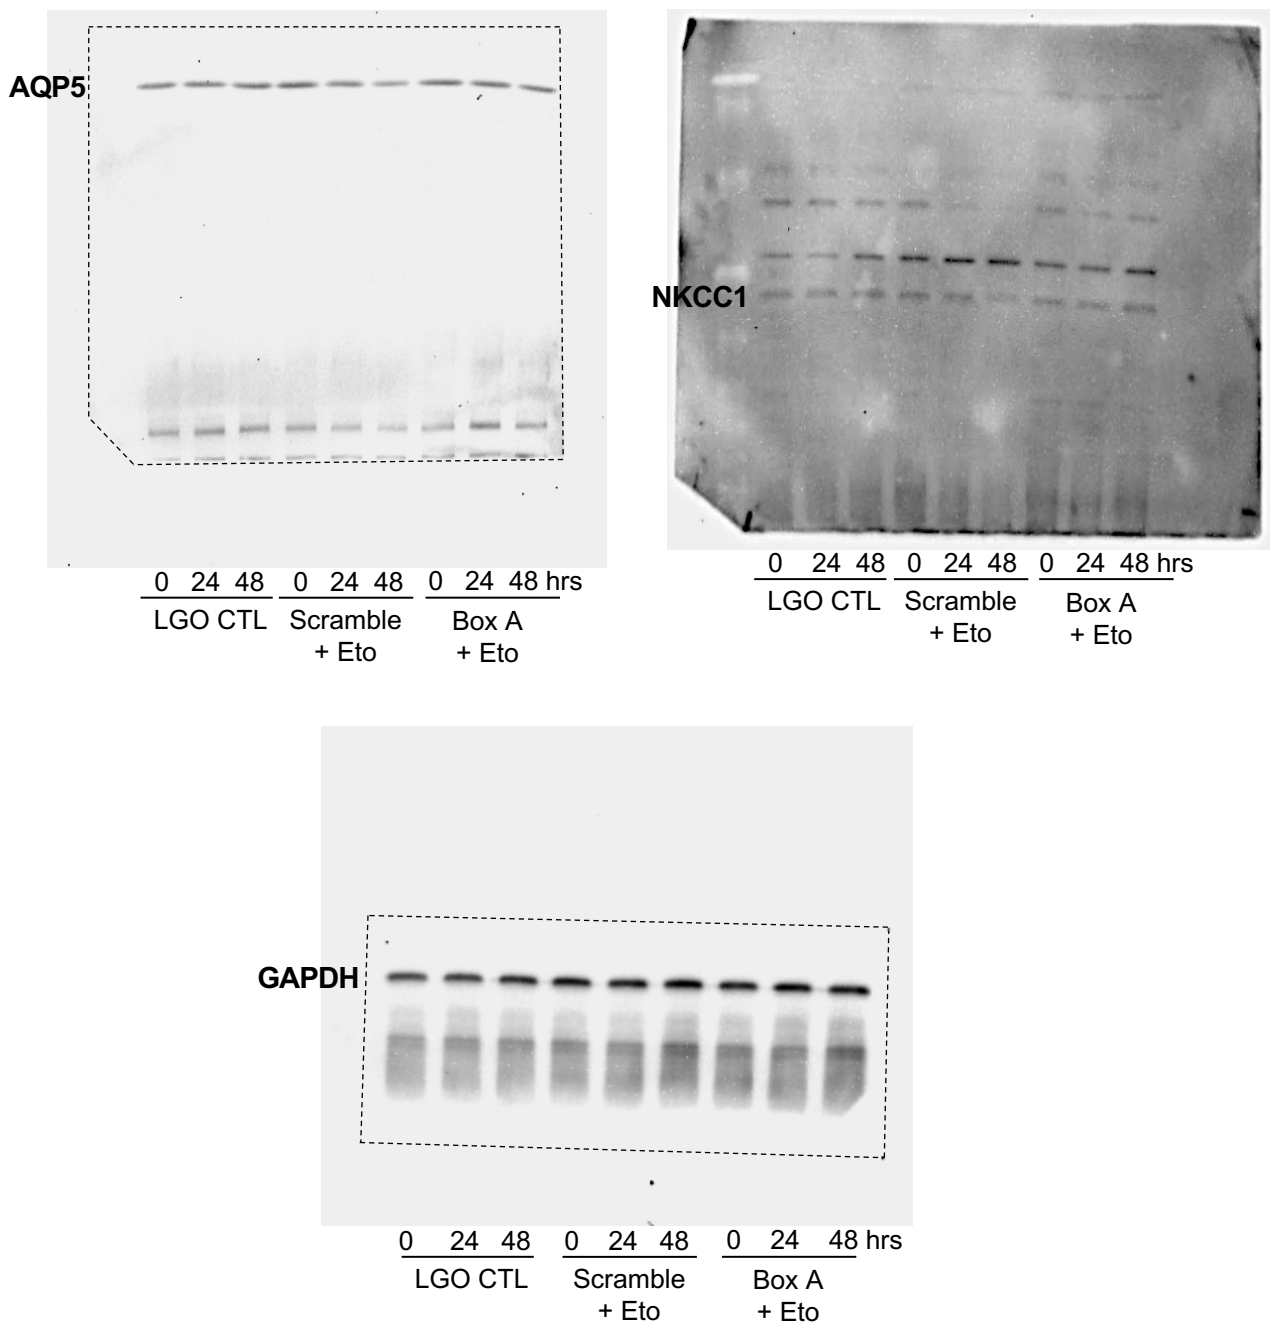

**Figure S7.** Full-length western blots used to produce Figure 5F. These images are the original and unprocessed versions. The top left blot for AQP5 and the lower one for GAPDH were cut prior to hybridization with antibodies, and a black dashed line was added to demarcate the membrane edges of the blots. Blot for NKCC1 has membrane edges visible. Predicted band sizes for: AQP5 – 28 kDa; NKCC1 – 130-180 kDa depending on glycosylation level; GAPDH - 37 kDa.
